# Supplementary material for: Long-Term Outcomes of Subcallosal Cingulate Deep Brain Stimulation for Treatment-Resistant Depression
Source: Atypon-hosted journal article supplement (doi:10.1176/appi.ajp.2019.18121427), 2019-10-04
Supplement: appi.ajp.2019.18121427.ds001.pdf [file appi.ajp.2019.18121427.ds001.pdf]

**Supplemental Figure S1** Individual Responses to SCC DBS Over 8 Years

|          | 1 year    | 2 years   | 3 years   | 4 years   | 5 years   | 6 years   | 7 years   | 8 years   | % improvement |
|----------|-----------|-----------|-----------|-----------|-----------|-----------|-----------|-----------|---------------|
| 1        | 26        | 52        | 37        | 31        | 42        | 46        | 45        | 59°       | >75%          |
| 2*       | 45        | 65        | 53        | 51        | 58        | 66        | 68        | 46        | 50-74%        |
| 3        | 42        | 49        | 57        | 43        | 63        | 80        | 55        | 80        | 25-49%        |
| 4        | 30        | 65        | 51        | 61        | 85        | 85        | 70        | 68        | <25%          |
| 5        | 26        | 27        | exit      | exit      | exit      | exit      | exit      | exit      |               |
| 6        | 22        | exit      |               |
| 7        | 17        | 35        | 39        | 57        | 63        | 71        | 59        | 61        | >75%          |
| 8        | 71        | 34        | 59        | 49        | 41        | 35        | 16        | 72        | <25%          |
| 9        | 45        | 51        | 51        | 61        | 49        | exit      | exit      | exit      |               |
| 10       | 51        | 69        | 67        | 73        | 64        | 100       | 50        | 48        | >75%          |
| 11       | 53        | 76        | 53        | 78        | 88        | 60        | 76        | 79        | >75%          |
| 12       | 38        | 46        | 63        | 64        | 64        | 72        | 66        | 57        | >75%          |
| 13       | 47        | 49        | 80        | 81        | 78        | 51°       | 75        | 82        | >75%          |
| 14       | 82        | 95        | 92        | 55        | 68        | 5†        | 79        | 77        | >75%          |
| 15*      | 23        | 29†       | 55        | 20        | 30        | 47        | 18        | 2         | <25%          |
| 16       | 21        | 16        | 36        | 20        | 20        | 43        | 52        | 56        | >75%          |
| 17       | 23        | 71•       | 71        | 62        | 81        | 92        | 81        | 88        | >75%          |
| 18       | 40        | 44        | 58        | 65        | 40†       | 37        |           |           |               |
| 19       | 65        | 53        | 53        | 32        | 15†       | 45        |           |           |               |
| 20       | 49        | 58†       | 61        | 73        | 78        | 78        |           |           |               |
| 21       | 53        | 78        | 83        | 91•       | 100       | 100       |           |           |               |
| 22       | 24        | 44        | 19        | 32        | 39        | 46        |           |           |               |
| 23       | 27        | 60        | 61        | 63        | 63        |           |           |           |               |
| 24       | 55        | 44        | 44        | 34†       | 40        |           |           |           |               |
| 25       | 75        | 65        | 72        | 90        | 80        |           |           |           |               |
| 26       | 66        | 80        | 84        | 78        | 72        |           |           |           |               |
| 27       | 76        | 80        | 93        | 95        |           |           |           |           |               |
| 28       | 68        | 65        | 86        | 54        |           |           |           |           |               |
| <b>N</b> | <b>28</b> | <b>27</b> | <b>26</b> | <b>26</b> | <b>24</b> | <b>19</b> | <b>14</b> | <b>14</b> |               |

Longitudinal antidepressant response by year in 28 SCC DBS for TRD subjects. Improvement from baseline HDRS-17 was calculated according to the IDI method and expressed as a percent. Grey boxes represent bipolar diagnosis. Colors represent % improvement relative to baseline. Given baseline HDRS-17 scores, dark blue almost always represents remission ( $IDI-D \leq 7$ ). Based

on study criteria, light blue always represents treatment response. Orange indicates a partial response. Red is less than 25% improvement from baseline.

\*Participant exited the study after most recent time point. †Broken DBS system °Participant delayed battery replacement by several months, resulting in prolonged loss of stimulation •Permanently discontinued medications
